# Supplementary material for: Involvement of PpDof1 transcriptional repressor in the nutrient condition-dependent growth control of protonemal filaments in Physcomitrella patens
Source: PubMed Central journal article supplement — J Exp Bot. 2012 Feb 15;63(8):3185–97. doi: 10.1093/jxb/ers042 (PMC3350930; doi:10.1093/jxb/ers042), 2012-02-15
Supplement: supp_ers042_00072298-file001.pdf [file supp_ers042_00072298-file001.pdf]

**Involvement of PpDof1 transcriptional repressor in the nutrient condition-dependent growth control of protonemal filaments in *Physcomitrella patens***

Takumi Sugiyama, Tetsuya Ishida, Nobumitsu Tabei, Mikao Shigyo, Mineko Konishi, Tadakatsu Yoneyama and Shuichi Yanagisawa

**Supplementary Table S1.** Upregulated genes in the *ppdof1 ppdof2* disruptants

| Locus tag         | Annotation                                                                               | log <sub>2</sub> change |
|-------------------|------------------------------------------------------------------------------------------|-------------------------|
| PHYPADRAFT_68138  | unknown                                                                                  | 3.20 ± 0.47             |
| PHYPADRAFT_165889 | Iron/manganese superoxide dismutases, alpha-hairpin domain                               | 2.48 ± 0.84             |
| PHYPADRAFT_69453  | Chlorophyll a-b binding protein                                                          | 2.95 ± 1.04             |
| PHYPADRAFT_202843 | Peroxiredoxin                                                                            | 2.94 ± 0.14             |
| PHYPADRAFT_173587 | unknown                                                                                  | 2.90 ± 0.61             |
| PHYPADRAFT_160804 | Glycosyl hydrolases family 17                                                            | 2.86 ± 0.24             |
| PHYPADRAFT_167726 | Cupin domain                                                                             | 2.90 ± 0.37             |
| PHYPADRAFT_64376  | unknown                                                                                  | 2.87 ± 0.30             |
| PHYPADRAFT_163308 | Ferric reductase-like transmembrane component                                            | 2.82 ± 0.11             |
| PHYPADRAFT_25927  | Glycoside hydrolase family 19 chitinase domain                                           | 2.70 ± 0.15             |
| PHYPADRAFT_125261 | Ferredoxin. DnaJ domain or J-domain.                                                     | 2.58 ± 0.21             |
| PHYPADRAFT_73142  | unknown                                                                                  | 2.58 ± 0.82             |
| PHYPADRAFT_122188 | PQ loop repeat                                                                           | 2.54 ± 0.13             |
| PHYPADRAFT_90820  | Esterase and lipase                                                                      | 2.31 ± 0.57             |
| PHYPADRAFT_37064  | Cu-Zn superoxide dismutase                                                               | 2.30 ± 1.11             |
| PHYPADRAFT_232139 | unknown                                                                                  | 2.29 ± 0.72             |
| PHYPADRAFT_145447 | DnaJ domain or J-domain                                                                  | 2.25 ± 0.51             |
| PHYPADRAFT_114029 | Secretory peroxidase                                                                     | 2.13 ± 0.45             |
| PHYPADRAFT_145680 | Alpha-amylase inhibitors (AAI), lipid transfer (LT) and seed storage (SS) protein family | 2.10 ± 0.59             |
| PHYPADRAFT_173687 | unknown                                                                                  | 2.08 ± 0.64             |
| PHYPADRAFT_95604  | unknown                                                                                  | 1.98 ± 0.17             |
| PHYPADRAFT_170107 | Mitochondrial carrier protein                                                            | 1.92 ± 0.05             |
| PHYPADRAFT_69013  | Pollen proteins Ole e I like                                                             | 1.91 ± 0.60             |
| PHYPADRAFT_30880  | TIR domain. P-loop containing nucleoside triphosphate hydrolases.                        | 1.84 ± 0.30             |
| PHYPADRAFT_89542  | unknown                                                                                  | 1.84 ± 0.16             |
| PHYPADRAFT_146384 | Proline dehydrogenase                                                                    | 1.82 ± 1.02             |
|                   |                                                                                          | 1.79 ± 0.31             |
|                   |                                                                                          | 1.79 ± 0.33             |

|                   |                                                                                          |             |
|-------------------|------------------------------------------------------------------------------------------|-------------|
| PHYPADRAFT_94476  | unknown                                                                                  | 1.79 ± 0.12 |
| PHYPADRAFT_117974 | Alpha-amylase inhibitors (AAI), lipid transfer (LT) and seed storage (SS) Protein family | 1.74 ± 0.06 |
| PHYPADRAFT_89773  | unknown                                                                                  | 1.72 ± 0.17 |
| PHYPADRAFT_158136 | unknown                                                                                  | 1.69 ± 0.10 |
| PHYPADRAFT_87007  | unknown                                                                                  | 1.65 ± 0.46 |
| PHYPADRAFT_71631  | Helix-loop-helix domain                                                                  | 1.65 ± 0.11 |
| PHYPADRAFT_107294 | Scramblase                                                                               | 1.64 ± 0.26 |
| PHYPADRAFT_122405 | Alpha-amylase inhibitors (AAI), lipid transfer (LT) and seed storage (SS) Protein family | 1.62 ± 0.10 |

---

**Supplementary Table S2.** Downregulated genes in the *ppdof ppdof2* disruptants

| Locus tag         | Annotation                                                            | log <sub>2</sub> change |
|-------------------|-----------------------------------------------------------------------|-------------------------|
| PHYPADRAFT_100880 | SGNH_hydrolase                                                        | -3.66 ± 0.56            |
| PHYPADRAFT_194870 | SGNH_plant_lipase_like                                                | -2.86 ± 0.29            |
| PHYPADRAFT_68163  | unknown                                                               | -3.59 ± 0.63            |
| PHYPADRAFT_233344 | unknown                                                               | -3.18 ± 0.18            |
| PHYPADRAFT_86373  | unknown                                                               | -2.87 ± 0.20            |
| PHYPADRAFT_23582  | Leucine-rich repeat (LRR) protein                                     | -3.13 ± 0.42            |
| PHYPADRAFT_74713  | unknown                                                               | -3.07 ± 0.29            |
| PHYPADRAFT_173117 | Ribosomal_S5                                                          | -3.01 ± 0.21            |
| PHYPADRAFT_161936 | Late embryogenesis abundant protein                                   | -2.87 ± 0.61            |
| PHYPADRAFT_223469 | Catalase                                                              | -2.87 ± 0.31            |
| PHYPADRAFT_149648 | GT1_Glycogen_synthase_DULL1_like                                      | -2.82 ± 0.41            |
| PHYPADRAFT_118942 | Secretory_peroxidase                                                  | -2.76 ± 1.23            |
| PHYPADRAFT_86110  | unknown                                                               | -2.74 ± 0.75            |
| PHYPADRAFT_90070  | unknown                                                               | -2.70 ± 0.53            |
| PHYPADRAFT_100451 | unknown                                                               | -2.69 ± 0.77            |
| PHYPADRAFT_181837 | Glyoxal oxidase N-terminus                                            | -2.67 ± 0.40            |
| PHYPADRAFT_153753 | The Major facilitator superfamily                                     | -2.66 ± 0.56            |
| PHYPADRAFT_159273 | Ligand-binding bet_v_1 domain of major pollen allergen of white birch | -2.66 ± 0.29            |
| PHYPADRAFT_66753  | High affinity sulphate transporter 1                                  | -2.29 ± 0.79            |
| PHYPADRAFT_153324 | PpDof1                                                                | -2.63 ± 0.49            |
| PHYPADRAFT_96498  | unknown                                                               | -2.63 ± 0.61            |
| PHYPADRAFT_76126  | unknown                                                               | -2.62 ± 1.00            |
| PHYPADRAFT_229808 | Helix-loop-helix domain                                               | -2.61 ± 1.06            |
|                   |                                                                       | -2.06 ± 0.72            |
|                   |                                                                       | -2.58 ± 0.96            |
|                   |                                                                       | -2.57 ± 0.83            |
|                   |                                                                       | -2.54 ± 0.37            |
|                   |                                                                       | -2.56 ± 0.42            |
|                   |                                                                       | -2.55 ± 0.26            |

|                   |                                                                                          |                              |
|-------------------|------------------------------------------------------------------------------------------|------------------------------|
| PHYPADRAFT_97018  | ATP-binding cassette transporter, subfamily G, member 8, group WBC protein PpABCG8       | -2.49 ± 0.55                 |
| PHYPADRAFT_77295  | Alpha-amylase inhibitors (AAI), lipid transfer (LT) and seed storage (SS) Protein family | -2.45 ± 0.42                 |
| PHYPADRAFT_168333 | unknown                                                                                  | -2.45 ± 0.12<br>-2.44 ± 1.61 |
| PHYPADRAFT_135849 | Nuclear transport factor 2 (NTF2-like) superfamily                                       | -2.42 ± 0.17<br>-2.31 ± 0.14 |
| PHYPADRAFT_96658  | unknown                                                                                  | -2.36 ± 0.73<br>-1.97 ± 0.99 |
| PHYPADRAFT_110746 | Glyoxal oxidase N-terminus                                                               | -2.35 ± 0.37<br>-2.30 ± 0.43 |
| PHYPADRAFT_64365  | Von Willebrand factor type A (vWA) domain. Cache domain.                                 | -2.34 ± 0.53<br>-2.14 ± 0.44 |
| PHYPADRAFT_217084 | Alpha-tubulin suppressor and related RCC1 domain-containing proteins                     | -2.32 ± 0.38<br>-1.98 ± 0.15 |
| PHYPADRAFT_162067 | Xyloglucan fucosyltransferase                                                            | -2.30 ± 0.44                 |
| PHYPADRAFT_169433 | unknown                                                                                  | -2.29 ± 0.51<br>-2.19 ± 0.16 |
| PHYPADRAFT_134960 | Exostosin family                                                                         | -2.26 ± 0.61                 |
| PHYPADRAFT_91246  | unknown                                                                                  | -2.25 ± 0.29                 |
| PHYPADRAFT_80479  | unknown                                                                                  | -2.25 ± 0.46                 |
| PHYPADRAFT_229071 | F-box domain                                                                             | -2.22 ± 0.70<br>-1.90 ± 0.30 |
| PHYPADRAFT_188562 | Glycosyltransferase_GTB_type                                                             | -2.22 ± 0.12<br>-2.14 ± 0.21 |
| PHYPADRAFT_231894 | BTB/POZ domain                                                                           | -2.20 ± 0.35                 |
| PHYPADRAFT_219649 | Cytochrome P450                                                                          | -2.19 ± 0.22<br>-2.13 ± 0.32 |
| PHYPADRAFT_135133 | DNA recombination-mediator protein A                                                     | -2.15 ± 0.63                 |
| PHYPADRAFT_90046  | unknown                                                                                  | -2.12 ± 0.82                 |
| PHYPADRAFT_91983  | unknown                                                                                  | -2.08 ± 0.13                 |

|                   |                                                     |              |
|-------------------|-----------------------------------------------------|--------------|
| PHYPADRAFT_234128 | unknown                                             | -2.08 ± 0.21 |
| PHYPADRAFT_86159  | unknown                                             | -2.07 ± 0.62 |
| PHYPADRAFT_56368  | Chalcone and stilbene synthases                     | -2.07 ± 0.11 |
| PHYPADRAFT_80897  | unknown                                             | -2.06 ± 0.50 |
| PHYPADRAFT_115513 | Major intrinsic protein (MIP) superfamily           | -2.06 ± 0.76 |
| PHYPADRAFT_138651 | PpDof2                                              | -2.53 ± 0.57 |
| PHYPADRAFT_34885  | MAEBL; Provisional                                  | -2.03 ± 0.38 |
| PHYPADRAFT_66006  | Agenet domain                                       | -2.02 ± 0.68 |
| PHYPADRAFT_169177 | P-loop NTPase                                       | -2.01 ± 0.26 |
| PHYPADRAFT_161598 | unknown                                             | -2.01 ± 0.17 |
| PHYPADRAFT_84239  | Glycosyl hydrolase family 79, N-terminal domain     | -2.00 ± 0.37 |
| PHYPADRAFT_169496 | unknown                                             | -1.96 ± 0.86 |
| PHYPADRAFT_91770  | unknown                                             | -1.96 ± 0.26 |
| PHYPADRAFT_29408  | Root cap                                            | -1.95 ± 0.16 |
| PHYPADRAFT_102974 | unknown                                             | -1.93 ± 0.77 |
| PHYPADRAFT_166762 | unknown                                             | -1.92 ± 0.09 |
| PHYPADRAFT_7641   | Glyoxalase/bleomycin resistance protein/dioxygenase | -1.92 ± 0.40 |
| PHYPADRAFT_182167 | Late embryogenesis abundant protein, group 4        | -1.92 ± 0.27 |
| PHYPADRAFT_91962  | unknown                                             | -1.91 ± 0.62 |
| PHYPADRAFT_169169 | PpDof14                                             | -1.90 ± 0.48 |
| PHYPADRAFT_92203  | unknown                                             | -1.90 ± 0.72 |
| PHYPADRAFT_127405 | Fatty acid hydroxylase superfamily                  | -1.89 ± 0.17 |
| PHYPADRAFT_78176  | Fatty acid hydroxylase superfamily                  | -1.89 ± 0.15 |
| PHYPADRAFT_64198  | SGNH_hydrolase                                      | -1.87 ± 0.45 |
| PHYPADRAFT_126819 | Chalcone and stilbene synthases                     | -1.87 ± 0.34 |
| PHYPADRAFT_62169  | Major intrinsic protein (MIP) superfamily           | -1.86 ± 0.12 |
| PHYPADRAFT_113110 | Exo70 exocyst complex subunit                       | -1.86 ± 0.84 |
| PHYPADRAFT_126580 | Rhamnogalacturonate lyase family                    | -1.85 ± 0.29 |
| PHYPADRAFT_166880 | Uncharacterized conserved protein (DUF2235)         | -1.85 ± 0.17 |
| PHYPADRAFT_230875 | C2H2-type zinc finger protein                       | -1.83 ± 0.79 |
| PHYPADRAFT_225082 | Xyloglucan endotransglycosylase, member of glycosyl | -1.82 ± 0.24 |

|                   |                                                                                                                  |                              |
|-------------------|------------------------------------------------------------------------------------------------------------------|------------------------------|
|                   | hydrolase family 16                                                                                              | -1.76 ± 0.21                 |
| PHYPADRAFT_77701  | unknown                                                                                                          | -1.82 ± 0.48                 |
| PHYPADRAFT_163142 | Fasciclin domain                                                                                                 | -1.80 ± 0.07                 |
| PHYPADRAFT_135547 | SGNH_hydrolase                                                                                                   | -1.76 ± 0.15                 |
| PHYPADRAFT_152778 | GDP-fucose protein O-fucosyltransferase                                                                          | -1.75 ± 0.51                 |
| PHYPADRAFT_89752  | Plant protein of unknown function (DUF869)                                                                       | -1.75 ± 0.33                 |
| PHYPADRAFT_84406  | F-box domain, cyclin-like                                                                                        | -1.74 ± 0.59                 |
| PHYPADRAFT_147950 | E1-E2 ATPase                                                                                                     | -1.73 ± 0.66                 |
| PHYPADRAFT_82584  | GT1_Glycogen_synthase_DULL1_like                                                                                 | -1.73 ± 0.14                 |
| PHYPADRAFT_99425  | unknown                                                                                                          | -1.72 ± 0.49                 |
| PHYPADRAFT_102734 | Carbonic anhydrase alpha, prokaryotic-like subfamily                                                             | -1.72 ± 0.29                 |
| PHYPADRAFT_19854  | homeobox domain, ZF-HD class                                                                                     | -1.71 ± 0.04                 |
| PHYPADRAFT_195732 | GH31_MGAM_SI_GAA,maltase-glucoamylase (MGAM),<br>sucrase-isomaltase (SI), and lysosomal acid alpha-glucosidase   | -1.71 ± 0.11                 |
| PHYPADRAFT_233161 | unknown                                                                                                          | -1.67 ± 0.13                 |
| PHYPADRAFT_60268  | homeobox domain, ZF-HD class. ZF-HD protein dimerisation<br>region.                                              | -1.65 ± 0.13<br>-1.64 ± 0.33 |
| PHYPADRAFT_211389 | Esterase_lipase                                                                                                  | -1.64 ± 0.27                 |
| PHYPADRAFT_21889  | Leucine-rich repeats (LRRs), ribonuclease inhibitor (RI)-like<br>subfamily. Catalytic domain of Protein Kinases. | -1.64 ± 0.27                 |
| PHYPADRAFT_19707  | Stigma-specific protein, Stig1                                                                                   | -1.63 ± 0.33                 |

**Supplementary Table S3.** Primers used for semi-quantitative and quantitative RT-PCR analysis

| <b>Target</b>                           | <b>Forward (5' &gt; 3')</b> | <b>Reverse (5' &gt; 3')</b> |
|-----------------------------------------|-----------------------------|-----------------------------|
| For RT-PCR and semi-quantitative RT-PCR |                             |                             |
| <i>PpDof1</i> (Fig. 1)                  | CGCCATTAAGCTGTTTGGTAAGA     | CGTTATTACTCTCCTTGCCACATGA   |
| <i>PpDof1</i> (Fig. S1)                 | CGCCATTAAGCTGTTTGGTAAGA     | TGTCAAGGCTATCGCACCTA        |
| <i>PpDof2</i> (Fig. 1)                  | AAGGCCGCTACCTCGATGAAC       | CGGCCTTACAAGAGGTTGTCACG     |
| <i>PpDof2</i> (Fig. S1)                 | TCAGTAGGTGGCAAGACGGATAG     | GGAAGATTCATTGCAAGTGCTC      |
| <i>PpDof3</i>                           | TGGTCACACCTTTTCCTCTTTCTTC   | GTACTIONGGCTGCTGGAACCTT     |
| <i>PpDof4</i>                           | AGAGATGTTGAAGGGCGAGTAGC     | GATTACTGGGACTGCTGGCATT      |
| <i>PpDof5</i>                           | TAACTGCTCGATTCAAAGTGATTCC   | TGCAGTCTTTGTCCATTCCATTT     |
| <i>PpDof6</i>                           | TCAGAAAGCAGGTTTCATCCCTAAAG  | AACGCTGATGAATTGTAAGCAGA     |
| <i>PpTUA2</i><br>(PHYPADRAFT_29741)     | TGTGCTGCTGGATAATGAAGCG      | CTCGTGCTGTTTCGAAATCATGC     |
| For quantitative RT-PCR                 |                             |                             |
| PHYPADRAFT_69453                        | CATTACCGGCTGCCTGACCCC       | ACCCGGGGACGCCTAGGTAGT       |
| PHYPADRAFT_167726                       | GGGCAGTAAGCCTGTGGTGGC       | CGCTGCCGAACAAGGTCGCT        |
| PHYPADRAFT_149648                       | GCCGGACGACTTCAAGCGCT        | TGGAGGTAAGACCCGCACTGGA      |
| PHYPADRAFT_181837                       | GCCTGAGGCAAGTTCGTGCT        | CCTTGCGCTTCCACCACCGA        |
| <i>PpABC8</i><br>(PHYPADRAFT_97018)     | ATCGGCGCTTCCGTACAGGC        | GCGTGGCCAGCCTTTGAGGT        |
| <i>PpTUB1</i><br>(PHYPADRAFT_186458)    | GACTGCTTGCAAGGTTTCCAAG      | GTTCAAGTCGCCAAACGAAGGA      |



**Supplementary Table S4.** PCR primers used for the isolation of cDNA and genomic clones and preparation of DNA probes for genomic Southern blot analysis

| <b>Target</b>                | <b>Forward (5' &gt; 3')</b> | <b>Reverse (5' &gt; 3')</b> |
|------------------------------|-----------------------------|-----------------------------|
| The 5' region of PpDof5 cDNA | ACATCTCCTCTCAGCTATGGACCTC   | ACTGAACGACATCGTGCTCCTA      |
| The 3' region of PpDof5 cDNA | TAGGAGCACGATGTCGTTTCAGT     |                             |
| PpDof1 genomic clone         | ATGAGGAGGTTGTTGAGCACGTA     | CCCATAAACCCAGTCCACACATTC    |
| PpDof2 genomic clone         | TCAGTAGGTGGCAAGACGGATAG     | CACATACCCGTCCAGACATTAC      |
| PpDof1-specific probe        | GATACCCATTCATTCATCCAAACAA   | ATTGCTCCTTTTTCTCCTCAACAGT   |
| PpDof2-specific probe        | GGCAGTGTATTTTGCTTTGCTTTG    | CAATAACCCATTTCCATTCTGATTGC  |

## Legends for supplementary figures

**Supplementary Fig. S1.** Targeted disruption of the *PpDof1* and *PpDof2* genes. (A) Genomic organization of the wild type (WT) and disrupted *PpDof1* and *PpDof2* gene loci and gene targeting vectors, depicted schematically. The white, hatched and black boxes indicate the 5' and 3' untranslated regions, the coding regions and the sequence encoding the Dof domain, respectively. Regions corresponding to the DNA probes used for genomic Southern blot analysis, which were prepared by PCR using the primers listed in Supplementary Table S4, are indicated by black bars. E, *EcoRI* site; P35S, cauliflower mosaic virus 35S RNA promoter; *HPT*, hygromycin phosphotransferase gene; Tnos, terminator sequence of nopaline synthase gene; Pm35S, a modified 35S promoter; *NPTII*, neomycin phosphotransferase II gene; 35SPA, the polyadenylation signal of cauliflower mosaic virus 35S RNA gene. (B) Genomic Southern blot analysis using *EcoRI*-digested genomic DNA. PpDof1- (PpDof1) and PpDof2-specific (PpDof2) probes were labeled using the AlkPhos Direct Labeling System and signals were detected using the CDP-star kit (GE Healthcare, Tokyo, Japan). Positions of the DNA fragments originating from the wild-type (w) and disrupted (d) *PpDof1* or *PpDof2* genes are indicated by arrowheads. Only bands of the expected sizes were detected using genomic DNA of all transformants, with the exception of the *ppdof1*-#2 line and the PpDof1-specific probe. (C) Semi-quantitative RT-PCR analysis of *PpDof1* and *PpDof2* mRNA in the wild type and disruptant lines. Transcripts of *PpTUA2* (accession number AB096719) were detected as a control.

**Supplementary Fig. S2.** Nuclear localization of PpDof2. Fluorescence (G) and corresponding bright (BF) images of maize protoplasts transfected with expression vectors for GFP alone, the EIN3(1-449)-GFP fusion protein as a nuclear localization control (Yanagisawa *et al.*, 2003), or the GFP-PpDof2 fusion protein.

**Supplementary Fig. S3.** Expression levels of *PpDof1* and *PpDof2* in protonemal colonies grown under different nutrient conditions. RNA was prepared from protonemal colonies that were initially grown in regeneration medium for three days after protoplasting and then with BCD medium, BCD medium supplemented with ammonium (BCD+A) or BCD medium supplemented with ammonium and glucose

(BCD+A+G) for 10 days. Values are the means  $\pm$  SD of three replicates relative to the transcript levels of the  $\beta$ -tubulin 1 gene (*PpTUB1*) (Holm *et al.*, 2010). The expression levels of these genes in the wild type plants grown on BCD medium supplemented with ammonium and glucose were assigned a reference value of 1 unit.

## References

**Holm K, Källmann T, Gyllenstrand N, Hedman H, Lagercrantz U.** 2010. Does the core circadian clock in the moss *Physcomitrella patens* (Bryophyta) comprise a single loop? *BMC Plant Biology* **10**, 109.

**Yanagisawa S, Yoo S-D, Sheen J.** 2003. Differential regulation of EIN3 stability by glucose and ethylene signalling in plants. *Nature* **425**, 521-525.

**A**

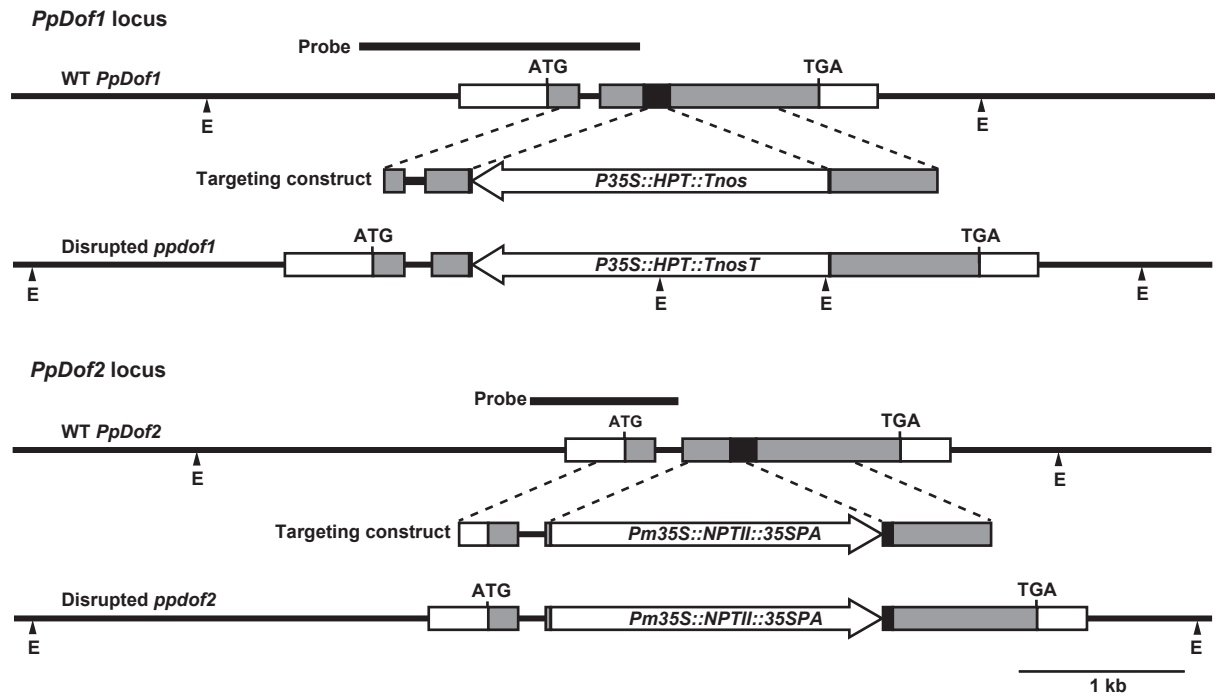

**B**

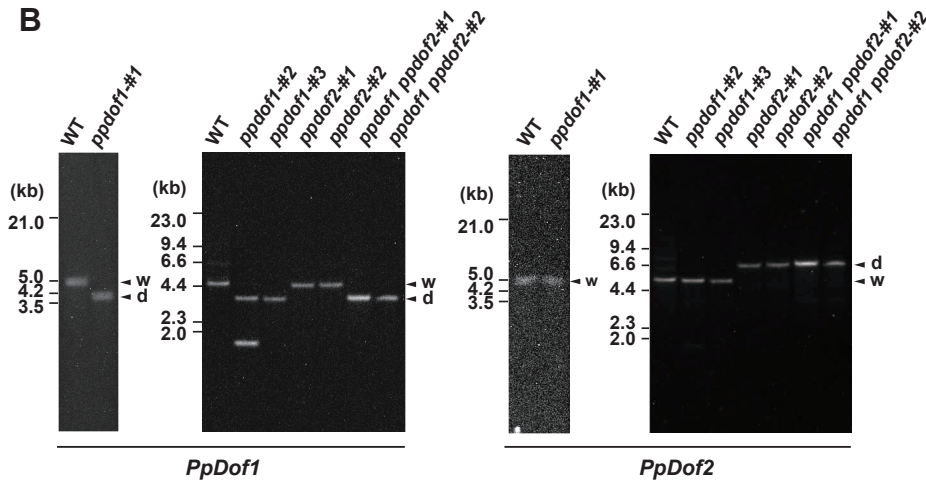

**C**

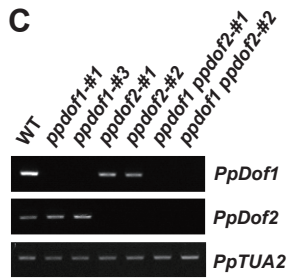

Figure S1. Sugiyama et al.

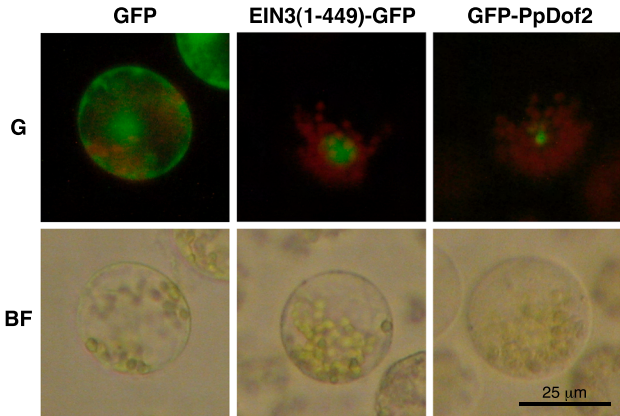

Figure S2. Sugiyama et al

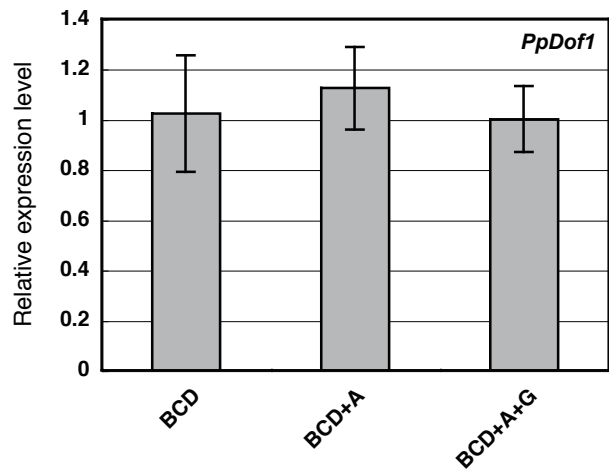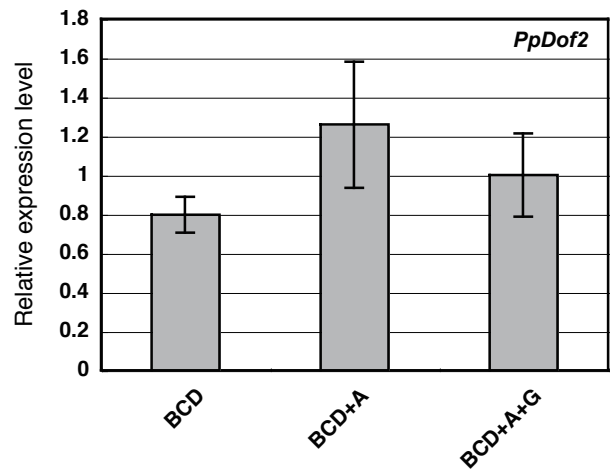

Figure S3. Sugiyama et al.
